# Supplementary material
Source: PubMed Central journal article supplement (PMC4689638)
Supplement: NIHMS738631-supplement-Online_Appendix.pdf [file NIHMS738631-supplement-Online_Appendix.pdf]

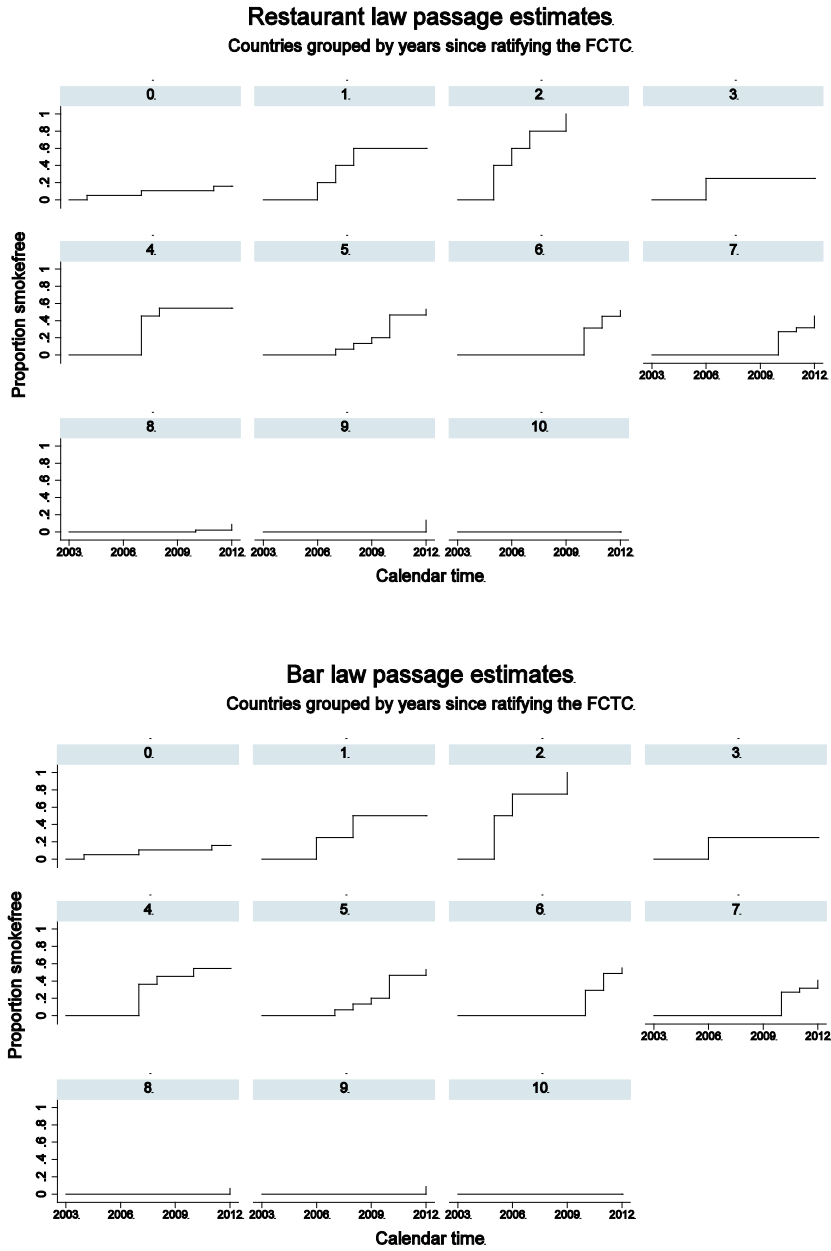

Figure A1. The Framework Convention on Tobacco Control's effects were strongest in earlier years following ratification, as shown by the cumulative success functions for smokefree restaurant (top) and bar (bottom) laws.

Year of FCTC Ratification and Enactment of National Smokefree Legislation  
(as of the End of 2012)

| Country                          | FCTC Ratified | Workplaces | Restaurants | Bars |
|----------------------------------|---------------|------------|-------------|------|
| Afghanistan                      | 2010          |            |             |      |
| Albania                          | 2006          | 2006       | 2006        | 2006 |
| Algeria                          | 2006          |            |             |      |
| Angola                           | 2007          |            |             |      |
| Argentina                        |               | 2011       | 2011        | 2011 |
| Armenia                          | 2004          |            |             |      |
| Australia                        | 2004          |            |             |      |
| Austria                          | 2005          |            |             |      |
| Azerbaijan                       | 2005          |            |             |      |
| Bahrain                          | 2007          |            |             |      |
| Bangladesh                       | 2004          |            |             |      |
| Belarus                          | 2005          |            |             |      |
| Belgium                          | 2005          |            |             |      |
| Benin                            | 2005          | 2007       |             |      |
| Bhutan                           | 2004          | 2005       | 2005        | 2005 |
| Bolivia (Plurinational State of) | 2005          |            |             |      |
| Bosnia and Herzegovina           | 2009          |            |             |      |
| Botswana                         | 2005          |            |             |      |
| Brazil                           | 2005          | 2012       | 2012        | 2012 |
| Bulgaria                         | 2005          | 2012       | 2012        | 2012 |
| Burkina Faso                     | 2006          | 2010       | 2010        | 2010 |
| Burundi                          | 2005          |            |             |      |
| Cambodia                         | 2005          |            |             |      |
| Cameroon                         | 2006          |            |             |      |
| Canada                           | 2004          |            |             |      |
| Cape Verde                       | 2005          |            |             |      |
| Central African Republic         | 2005          |            |             |      |
| Chad                             | 2006          | 2010       | 2010        | 2010 |
| Chile                            | 2005          |            |             |      |
| China                            | 2005          |            |             |      |
| Colombia                         | 2008          | 2009       | 2009        | 2009 |
| Comoros                          | 2006          |            |             |      |
| Congo                            | 2007          | 2012       | 2012        | 2012 |
| Costa Rica                       | 2008          | 2012       | 2012        | 2012 |
| Croatia                          | 2008          |            |             |      |
| Cuba                             |               |            |             |      |
| Cyprus                           | 2005          |            | 2010        | 2010 |
| Czech Republic                   | 2012          |            |             |      |
| Côte d'Ivoire                    | 2010          |            |             |      |
| Demo People's Rep of Korea       | 2005          |            |             |      |
| Demo Rep of the Congo            | 2005          |            |             |      |
| Denmark                          | 2004          |            |             |      |
| Djibouti                         | 2005          | 2007       |             |      |
| Dominican Republic               |               |            |             |      |
| Ecuador                          | 2006          | 2011       | 2007        | 2011 |
| Egypt                            | 2005          |            |             |      |
| El Salvador                      |               |            |             |      |
| Equatorial Guinea                | 2005          |            |             |      |
| Eritrea                          |               |            |             |      |
| Estonia                          | 2005          |            |             |      |
| Ethiopia                         |               |            |             |      |
| Fiji                             | 2003          |            | 2010        |      |
| Finland                          | 2005          |            |             |      |
| France                           | 2004          |            |             |      |
| Gabon                            | 2009          |            |             |      |
| Gambia                           | 2007          |            |             |      |
| Georgia                          | 2006          |            |             |      |
| Germany                          | 2004          |            |             |      |
| Ghana                            | 2004          |            |             |      |
| Greece                           | 2006          | 2010       | 2010        | 2010 |
| Guatemala                        | 2005          | 2008       | 2008        | 2008 |
| Guinea                           | 2007          |            | 2007        |      |
| Guinea-Bissau                    | 2008          |            |             |      |

|                                  |      |      |      |      |
|----------------------------------|------|------|------|------|
| Guyana                           | 2005 |      |      |      |
| Haiti                            |      |      |      |      |
| Honduras                         | 2005 | 2010 | 2010 | 2010 |
| Hungary                          | 2004 | 2012 | 2012 | 2012 |
| India                            | 2004 | 2010 |      |      |
| Indonesia                        |      |      |      |      |
| Iran (Islamic Republic of)       | 2005 | 2006 | 2006 | 2006 |
| Iraq                             | 2008 |      |      |      |
| Ireland                          | 2005 | 2004 | 2004 | 2004 |
| Israel                           | 2005 |      |      |      |
| Italy                            | 2008 |      |      |      |
| Jamaica                          | 2005 |      |      |      |
| Japan                            | 2004 |      |      |      |
| Jordan                           | 2004 |      |      |      |
| Kazakhstan                       | 2007 | 2010 |      | 2010 |
| Kenya                            | 2004 |      |      |      |
| Kuwait                           | 2006 |      | 2012 | 2012 |
| Kyrgyzstan                       | 2006 |      |      |      |
| Lao People's Democratic Republic | 2006 |      |      |      |
| Latvia                           | 2005 | 2007 | 2010 | 2010 |
| Lebanon                          | 2005 | 2011 | 2011 | 2011 |
| Lesotho                          | 2005 |      |      |      |
| Liberia                          | 2009 |      |      |      |
| Libya                            | 2005 | 2009 | 2009 | 2009 |
| Lithuania                        | 2004 |      | 2007 | 2007 |
| Luxembourg                       | 2005 |      |      |      |
| Madagascar                       | 2004 |      |      |      |
| Malawi                           |      |      |      |      |
| Malaysia                         | 2005 |      |      |      |
| Mali                             | 2005 |      |      |      |
| Marshall Islands                 | 2004 | 2006 | 2006 | 2006 |
| Mauritania                       | 2005 |      |      |      |
| Mauritius                        | 2004 |      | 2010 | 2010 |
| Mexico                           | 2004 |      |      |      |
| Mongolia                         | 2004 | 2012 | 2012 | 2012 |
| Montenegro                       | 2006 |      |      |      |
| Morocco                          |      | 2007 |      |      |
| Mozambique                       |      |      |      |      |
| Myanmar                          | 2004 |      |      |      |
| Namibia                          | 2005 | 2010 | 2010 | 2010 |
| Nepal                            | 2006 | 2011 | 2011 | 2011 |
| Netherlands                      | 2005 |      |      |      |
| New Zealand                      | 2004 | 2007 | 2007 | 2007 |
| Nicaragua                        | 2008 | 2010 |      |      |
| Niger                            | 2005 |      |      |      |
| Nigeria                          | 2005 |      |      |      |
| Norway                           | 2003 |      | 2007 | 2007 |
| Oman                             | 2005 |      |      |      |
| Pakistan                         | 2004 | 2007 | 2007 | 2007 |
| Panama                           | 2004 | 2008 | 2008 | 2008 |
| Papua New Guinea                 | 2006 | 2012 | 2012 | 2012 |
| Paraguay                         | 2006 |      |      |      |
| Peru                             | 2004 | 2010 | 2010 | 2010 |
| Philippines                      | 2005 |      |      |      |
| Poland                           | 2006 |      |      |      |
| Portugal                         | 2005 |      |      |      |
| Qatar                            | 2004 |      |      |      |
| Republic of Korea                | 2005 |      |      |      |
| Republic of Moldova              | 2009 |      |      |      |
| Romania                          | 2006 |      |      |      |
| Russian Federation               | 2008 |      |      |      |
| Rwanda                           | 2005 |      |      |      |
| Saudi Arabia                     | 2005 |      | 2012 | 2012 |
| Senegal                          | 2005 |      |      |      |
| Serbia                           | 2006 |      |      |      |
| Sierra Leone                     | 2009 |      |      |      |
| Singapore                        | 2004 |      | 2007 |      |
| Slovakia                         | 2004 |      |      |      |

|                                          |      |      |      |      |
|------------------------------------------|------|------|------|------|
| Slovenia                                 | 2005 |      |      |      |
| Solomon Islands                          | 2004 |      |      |      |
| Somalia                                  |      | 2007 |      |      |
| South Africa                             | 2005 |      |      |      |
| South Sudan                              |      |      |      |      |
| Spain                                    | 2005 | 2007 | 2010 | 2010 |
| Sri Lanka                                | 2003 | 2007 |      |      |
| Sudan                                    | 2005 |      |      |      |
| Suriname                                 | 2008 |      |      |      |
| Swaziland                                | 2006 |      |      |      |
| Sweden                                   | 2005 |      |      |      |
| Switzerland                              |      |      |      |      |
| Syrian Arab Republic                     | 2004 |      | 2010 | 2010 |
| Tajikistan                               |      |      |      |      |
| Thailand                                 | 2004 | 2010 | 2010 | 2010 |
| The former Yug Rep of Macedonia          | 2006 |      | 2010 | 2010 |
| Timor-Leste                              | 2004 |      |      |      |
| Togo                                     | 2005 |      |      |      |
| Trinidad and Tobago                      | 2004 | 2010 | 2010 | 2010 |
| Tunisia                                  | 2010 |      |      |      |
| Turkey                                   | 2004 | 2010 | 2010 | 2010 |
| Turkmenistan                             | 2011 | 2007 | 2007 | 2007 |
| Uganda                                   | 2007 | 2007 |      |      |
| Ukraine                                  | 2006 |      | 2012 |      |
| United Arab Emirates                     | 2005 |      |      |      |
| United Kingdom of Great Britain and Nort | 2004 | 2007 | 2007 | 2007 |
| United Republic of Tanzania              | 2007 |      |      |      |
| United States of America                 |      |      |      |      |
| Uruguay                                  | 2004 | 2005 | 2005 | 2005 |
| Uzbekistan                               | 2012 |      |      |      |
| Venezuela (Bolivarian Republic of)       | 2006 | 2011 | 2011 | 2011 |
| Viet Nam                                 | 2004 | 2007 | 2012 |      |
| Yemen                                    | 2007 |      |      |      |
| Zambia                                   | 2008 |      | 2008 | 2008 |
| Zimbabwe                                 |      |      |      |      |

---
